# Supplementary material
Source: publisher figshare collection journal article supplement (https://acs.figshare.com/ndownloader/files/5731104)
Supplement: Supplementary file 1 [file 5731104]

# Reversal of the Apparent Regiospecificity of NAD(P)H-Dependent Hydride Transfer: The Properties of the Difluoromethylene Group, A Carbonyl Mimic

Caroline Leriche, Xuemei He, Cheng-wei T. Chang and Hung-wen Liu\*

Division of Medicinal Chemistry, College of Pharmacy, and Department of Chemistry and Biochemistry, University of Texas, Austin, Texas 78712

Department of Chemistry, University of Minnesota, Minneapolis, Minnesota 55455

## Supporting Information

Scheme A

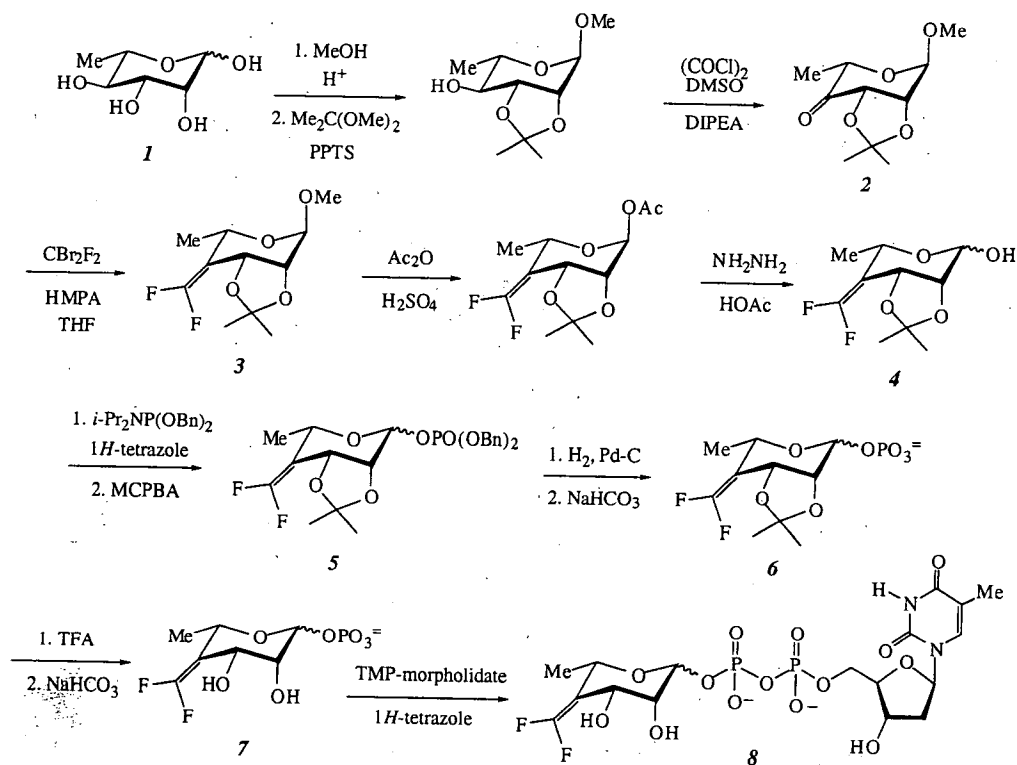

The C<sub>2</sub>- and C<sub>3</sub>-OH groups of methyl L-rhamnose, derived from L-rhamnose (1), were first selectively protected,<sup>1</sup> and the C<sub>4</sub>-OH was oxidized. The exocyclic difluoromethylene moiety was introduced by reacting the resultant 4-hexulose (2) with dibromodifluoromethane and hexamethylphosphoramide.<sup>2</sup> Selective deprotection of the anomeric-OH was achieved by the

treatment of **3** with acetic anhydride/sulfuric acid,<sup>3</sup> followed by hydrazine acetate.<sup>4</sup> A two-step sequence with *N,N*-diisopropylidibenzyl phosphoramidite and *m*-CPBA<sup>5</sup> was used to convert **4** to its C-1 phosphate (**5**). Subsequent hydrogenation (10% Pd/C) followed by treatment with a stoichiometric amount of bicarbonate afforded **6** in quantitative yield.<sup>6</sup> The isopropylidene moiety in **6** was removed by 25% aqueous trifluoroacetic acid,<sup>7</sup> and the product **7** was converted to its triethylammonium salt by passage through a cation-exchange column (BioRad AG 50W-X2, Et<sub>3</sub>NH<sup>+</sup> form). It should be noted that condensation of **7** with the 4-morpholine *N,N'*-dicyclohexylcarboxamidinium salt of thymidine 5'-monophosphate in the presence of 1*H*-tetrazole<sup>8</sup> afforded the desired product **8** as a mixture of  $\alpha$  and  $\beta$  anomers ( $8\alpha:8\beta = 3:1$ ). Due to the instability of **8** upon further purification and lyophilization, this mixture was used directly in the subsequent experiments.

1. Tadano, K. I.; Maeda, H.; Hoshino, M.; Limura, Y.; Suami, T. *J. Org. Chem.* **1987**, *52*, 1946.
2. Houlton, J. S.; Motherwell, W. B.; Ross, B. C.; Tozer, M. J.; Williams, D. J.; Slawin, A. M. *Z. Tetrahedron* **1993**, *49*, 8087.
3. Watanabe, S.; Kawai, I.; Bobek, M. *J. Carbohydr. Chem.* **1995**, *14*, 685.
4. Excoffier, G.; Gagnaire, D.; Utile, J.-P. *Carbohydr. Res.* **1975**, *39*, 368.
5. Yu, K. L.; Fraser-Reid, B. *Tetrahedron Lett.* **1988**, *29*, 979.
6. Leriche, C.; René, L.; Derouet, F.; Rousseau, B.; Badet, B. *J. Labelled Compd. Radiopharm.* **1995**, *36*, 1115.
7. Lewbart, M. L.; Schneider, J.-J. *J. Org. Chem.* **1969**, *34*, 3505.
8. Murray, B. W.; Wittmann, V.; Burkart, M. D.; Hung, S.-C.; Wong, C.-H. *Biochemistry* **1997**, *36*, 823.
